# Supplementary material
Source: publisher figshare collection journal article supplement (https://gsajournals.figshare.com/ndownloader/files/11357717)
Supplement: Supplementary file 1 [file 11357717]

**Table S1. Plasmids used in this study.**

Plasmid name Relevant Source

pRS313 - Sikorski and Hieter, 1989

pYO323 - Qadota et al., 1992

pAMS366 4x*CDRE*-lacZ Stathopoulos and Cyert, 1997

pTJK502 CEN HIS3 CNB1 This study

pTJK503 CEN HIS3 CNB1mutEF1 This study

pTJK504 CEN HIS3 CNB1mutEF2 This study

pTJK505 CEN HIS3 CNB1mutEF3 This study

pTJK506 CEN HIS3 CNB1mutEF4 This study

pTJK507 2m HIS3 CNB1 This study

pTJK508 2m HIS3 CNB1mutEF1 This study

pTJK509 2m HIS3 CNB1mutEF2 This study

pTJK510 2m HIS3 CNB1mutEF3 This study

pTJK511 2m HIS3 CNB1mutEF4 This study

pTJK512 CEN LEU2 CNB1 This study

pTJK513 CEN LEU2 CNB1mutEF1 This study

pTJK514 CEN LEU2 CNB1mutEF2 This study

pTJK515 CEN LEU2 CNB1mutEF3 This study

pTJK516 CEN LEU2 CNB1mutEF4 This study

pTJK517 CEN TRP1 CNA1 This study

pTJK518 CEN TRP1 CNA1AID This study

pTJK519 CEN TRP1 CNA1CBD This study
